# Supplementary material for: Apoptosis Induced by Piroxicam plus Cisplatin Combined Treatment Is Triggered by p21 in Mesothelioma
Source: PLoS One. 2011 Aug 17;6(8):e23569. doi: 10.1371/journal.pone.0023569 (PMC3157425; doi:10.1371/journal.pone.0023569)
Supplement: Table S1 — Differentially expressed probe sets after 24 hours with piroxicam or piroxicam/cisplatin treatment. (XLS) [file pone.0023569.s002.xls]

## Sheet: Sheet0
			Piroxicam 24 h	Piroxicam/Cisplatin 24 h
Symbol	Entrez Gene Name	Affymetrix_ID	Fold Change	Fold Change	Location	Type
AARS	alanyl-tRNA synthetase	201000_at	-2.518	-1.467	Cytoplasm	enzyme
ABCD3	ATP-binding cassette, sub-family D (ALD), member 3	202850_at	-1.318		Cytoplasm	transporter
ACADVL	acyl-Coenzyme A dehydrogenase, very long chain	200710_at		-2.101	Cytoplasm	enzyme
ADIPOR2	adiponectin receptor 2	201346_at	-1.356		Plasma Membrane	other
ADM	adrenomedullin	202912_at	1.595		Extracellular Space	other
AK2	adenylate kinase 2	212174_at	1.203		Cytoplasm	kinase
AKAP12	A kinase (PRKA) anchor protein 12	210517_s_at	-1.184	-1.010	Cytoplasm	transporter
AKR7A2	aldo-keto reductase family 7, member A2 (aflatoxin aldehyde reductase)	202139_at	-1.500		Cytoplasm	enzyme
ALDH1A3	aldehyde dehydrogenase 1 family, member A3	203180_at	-2.321		Cytoplasm	enzyme
ANP32A	acidic (leucine-rich) nuclear phosphoprotein 32 family, member A	201051_at	-1.705	-2.256	Nucleus	other
ANXA10	annexin A10	210143_at		1.249	Unknown	other
APLP2	amyloid beta (A4) precursor-like protein 2	208702_x_at	-1.397	1.553	Extracellular Space	other
ARC	activity-regulated cytoskeleton-associated protein	210090_at		-1.037	Cytoplasm	other
ARHGEF2	Rho/Rac guanine nucleotide exchange factor (GEF) 2	209435_s_at	-1.159	1.321	Cytoplasm	other
ARL6IP5	ADP-ribosylation-like factor 6 interacting protein 5	200761_s_at	1.535		Cytoplasm	other
ARMET	mesencephalic astrocyte-derived neurotrophic factor	202655_at	-1.213	1.270	Extracellular Space	other
ASF1A	ASF1 anti-silencing function 1 homolog A (S. cerevisiae)	203427_at	-2.039		Nucleus	other
ASNS	asparagine synthetase	205047_s_at	1.981		Unknown	enzyme
ASPM	asp (abnormal spindle) homolog, microcephaly associated (Drosophila)	219918_s_at	-1.118	-1.414	Nucleus	other
ATAD2	ATPase family, AAA domain containing 2	218782_s_at	-1.054		Unknown	other
ATF3	activating transcription factor 3	202672_s_at	-1.310	2.520	Nucleus	transcription regulator
ATF4	activating transcription factor 4 (tax-responsive enhancer element B67)	200779_at	-2.587		Nucleus	transcription regulator
ATP1B1	ATPase, Na+/K+ transporting, beta 1 polypeptide	201243_s_at	-1.671	1.239	Plasma Membrane	transporter
ATP2A2	ATPase, Ca++ transporting, cardiac muscle, slow twitch 2	212361_s_at	-1.313		Cytoplasm	transporter
ATP5G1	ATP synthase, H+ transporting, mitochondrial F0 complex, subunit C1 (subunit 9)	208972_s_at		1.434	Cytoplasm	transporter
ATP6V1D	ATPase, H+ transporting, lysosomal 34kDa, V1 subunit D	208899_x_at	-1.637		Cytoplasm	transporter
AURKA	aurora kinase A	204092_s_at	-1.827	-1.312	Nucleus	kinase
AURKB	aurora kinase B	209464_at			Nucleus	kinase
AVPI1	arginine vasopressin-induced 1	218631_at	-1.020	-1.251	Unknown	other
BAG5	BCL2-associated athanogene 5	202985_s_at	-1.696		Unknown	other
BARD1	BRCA1 associated RING domain 1	205345_at	-1.755		Nucleus	transcription regulator
BAT3	HLA-B associated transcript 3	--		-1.020	Nucleus	enzyme
BAZ1A	bromodomain adjacent to zinc finger domain, 1A	217985_s_at	-1.244		Nucleus	other
BCAR3	breast cancer anti-estrogen resistance 3	204032_at	-1.157	-1.144	Unknown	other
BCCIP	BRCA2 and CDKN1A interacting protein	218264_at	-1.241	-2.046	Nucleus	other
BCLAF1	BCL2-associated transcription factor 1	--		-1.604	Nucleus	transcription regulator
BIRC5	baculoviral IAP repeat-containing 5	202095_s_at	1.502	-1.393	Cytoplasm	other
BMP2K (includes EG:55589)	BMP2 inducible kinase	59644_at	1.034		Nucleus	kinase
BRCC3	BRCA1/BRCA2-containing complex, subunit 3	221196_x_at	-1.292		Unknown	other
BRMS1	breast cancer metastasis suppressor 1	215631_s_at		-1.123	Unknown	other
BTG1	B-cell translocation gene 1, anti-proliferative	200921_s_at	-3.536	-2.019	Nucleus	transcription regulator
BUB1 (includes EG:699)	budding uninhibited by benzimidazoles 1 homolog (yeast)	209642_at		-1.366	Nucleus	kinase
BUB1B	budding uninhibited by benzimidazoles 1 homolog beta (yeast)	203755_at	-1.404	2.484	Nucleus	kinase
C14ORF130	ubiquitin protein ligase E3 component n-recognin 7 (putative)	218108_at	-1.084		Unknown	enzyme
C1D	C1D nuclear receptor co-repressor	200056_s_at		-2.136	Nucleus	transcription regulator
C21ORF45	chromosome 21 open reading frame 45	219004_s_at	-1.112	-1.240	Unknown	other
CABC1	chaperone, ABC1 activity of bc1 complex homolog (S. pombe)	218168_s_at	1.184	-1.024	Cytoplasm	kinase
CACYBP	calcyclin binding protein	201381_x_at	-1.389	1.767	Nucleus	other
CAD	carbamoyl-phosphate synthetase 2, aspartate transcarbamylase, and dihydroorotase	202715_at		-1.276	Cytoplasm	enzyme
CADM1	cell adhesion molecule 1	209030_s_at	-1.392		Plasma Membrane	other
CALM1	calmodulin 1 (phosphorylase kinase, delta)	211984_at	-1.254		Plasma Membrane	other
CAND1	cullin-associated and neddylation-dissociated 1	208839_s_at	1.225		Cytoplasm	transcription regulator
CANX	calnexin	--		1.003	Cytoplasm	other
CAPG	capping protein (actin filament), gelsolin-like	201850_at	-2.049		Nucleus	other
CAPN7	calpain 7	203357_s_at	-1.482	-1.325	Cytoplasm	peptidase
CAPZA2	capping protein (actin filament) muscle Z-line, alpha 2	201237_at	-1.591	1.189	Cytoplasm	other
CAST	calpastatin	212586_at	1.301		Cytoplasm	peptidase
CAV1	caveolin 1, caveolae protein, 22kDa	203065_s_at	-1.490		Plasma Membrane	other
CCDC99	coiled-coil domain containing 99	221685_s_at	2.384		Unknown	other
CCDC85B	coiled-coil domain containing 85B	204610_s_at	1.480		Unknown	other
CCNA2	cyclin A2	213226_at	-1.276	-2.712	Nucleus	other
CCNB1	cyclin B1	214710_s_at		-1.172	Nucleus	other
CCNB2	cyclin B2	202705_at	-1.540	-1.078	Cytoplasm	other
CCNC	cyclin C	201955_at	-1.092		Nucleus	other
CCND1	cyclin D1	208712_at	1.210		Nucleus	other
CCND3	cyclin D3	201700_at	-1.585		Nucleus	other
CD44	CD44 molecule (Indian blood group)	210916_s_at	1.130		Plasma Membrane	other
CD55	CD55 molecule, decay accelerating factor for complement (Cromer blood group)	201926_s_at	1.820		Plasma Membrane	other
CDC2	cell division cycle 2, G1 to S and G2 to M	203213_at	-1.414	-1.204	Nucleus	kinase
CDC6	cell division cycle 6 homolog (S. cerevisiae)	203968_s_at	1.435		Nucleus	other
CDC42	cell division cycle 42 (GTP binding protein, 25kDa)	--		2.638	Cytoplasm	enzyme
CDC25A	cell division cycle 25 homolog A (S. pombe)	204695_at	-2.141		Nucleus	phosphatase
CDC45L	CDC45 cell division cycle 45-like (S. cerevisiae)	204126_s_at	-1.026		Nucleus	other
CDCA3	cell division cycle associated 3	221436_s_at	-1.046	-1.292	Cytoplasm	other
CDCA4	cell division cycle associated 4	218399_s_at	1.105		Nucleus	other
CDCA8	cell division cycle associated 8	221520_s_at	-1.098	1.180	Nucleus	other
CDK2	cyclin-dependent kinase 2	204252_at	-1.266	-1.017	Nucleus	kinase
CDKN3	cyclin-dependent kinase inhibitor 3	209714_s_at		-1.280	Nucleus	phosphatase
CDKN1A	cyclin-dependent kinase inhibitor 1A (p21, Cip1)	202284_s_at		3.329	Nucleus	kinase
CEBPB	CCAAT/enhancer binding protein (C/EBP), beta	212501_at	-1.043	-1.284	Nucleus	transcription regulator
CEBPG	CCAAT/enhancer binding protein (C/EBP), gamma	204203_at	1.261	2.631	Nucleus	transcription regulator
CENPA	centromere protein A	204962_s_at		-1.362	Nucleus	other
CENPE	centromere protein E, 312kDa	205046_at	-1.182		Nucleus	other
CEP55	centrosomal protein 55kDa	218542_at	-1.006	-1.087	Unknown	other
CEP170	centrosomal protein 170kDa	207719_x_at	1.267		Nucleus	other
CES2 (includes EG:8824)	carboxylesterase 2 (intestine, liver)	--		-1.277	Cytoplasm	enzyme
CHMP4A	chromatin modifying protein 4A	218571_s_at	1.999		Nucleus	other
CHST5	carbohydrate (N-acetylglucosamine 6-O) sulfotransferase 5	219182_at		-1.028	Extracellular Space	enzyme
CIZ1	CDKN1A interacting zinc finger protein 1	213977_s_at	1.255	-1.102	Nucleus	transporter
CKS2 (includes EG:1164)	CDC28 protein kinase regulatory subunit 2	204170_s_at	-1.215	-1.843	Unknown	kinase
CLCN3	chloride channel 3	201735_s_at	-1.129		Plasma Membrane	ion channel
CLEC2B	C-type lectin domain family 2, member B	209732_at	2.164		Plasma Membrane	other
CNN3	calponin 3, acidic	201445_at	-2.359	1.593	Cytoplasm	other
COPS3	COP9 constitutive photomorphogenic homolog subunit 3 (Arabidopsis)	202078_at	-2.476		Cytoplasm	other
CPSF1	cleavage and polyadenylation specific factor 1, 160kDa	--		1.383	Nucleus	other
CPSF6	cleavage and polyadenylation specific factor 6, 68kDa	202469_s_at	-1.475		Nucleus	other
CRK	v-crk sarcoma virus CT10 oncogene homolog (avian)	--		-1.230	Cytoplasm	other
CRTC3	CREB regulated transcription coactivator 3	218648_at	1.011		Unknown	other
CSDA	cold shock domain protein A	--		-1.262	Nucleus	transcription regulator
CSNK1A1	casein kinase 1, alpha 1	208866_at	1.505	-1.152	Cytoplasm	kinase
CSNK2A2	casein kinase 2, alpha prime polypeptide	203575_at		-1.151	Cytoplasm	kinase
CTGF	connective tissue growth factor	209101_at	-1.064		Extracellular Space	growth factor
CTNNAL1	catenin (cadherin-associated protein), alpha-like 1	202468_s_at	-1.199		Plasma Membrane	other
CTSC	cathepsin C	201487_at	-1.411		Cytoplasm	peptidase
CUL4B	cullin 4B	202213_s_at	-1.169		Unknown	other
CXCL2	chemokine (C-X-C motif) ligand 2	209774_x_at	1.157		Extracellular Space	cytokine
CXCL3	chemokine (C-X-C motif) ligand 3	207850_at	-1.155		Extracellular Space	cytokine
CYB5B	cytochrome b5 type B (outer mitochondrial membrane)	201634_s_at	-1.303		Cytoplasm	enzyme
CYFIP2	cytoplasmic FMR1 interacting protein 2	215785_s_at		-1.257	Cytoplasm	other
DBF4	DBF4 homolog (S. cerevisiae)	204244_s_at	1.528	-1.144	Nucleus	kinase
DCXR	dicarbonyl/L-xylulose reductase	217973_at	-1.091		Cytoplasm	enzyme
DDB2	damage-specific DNA binding protein 2, 48kDa	203409_at		-1.595	Nucleus	other
DDIT3	DNA-damage-inducible transcript 3	209383_at	-1.163	1.404	Nucleus	transcription regulator
DDX39	DEAD (Asp-Glu-Ala-Asp) box polypeptide 39	201584_s_at	-1.276		Nucleus	enzyme
DDX19A	DEAD (Asp-Glu-Ala-As) box polypeptide 19A	202578_s_at	-1.615		Nucleus	enzyme
DDX3X	DEAD (Asp-Glu-Ala-Asp) box polypeptide 3, X-linked	201211_s_at	-2.179		Nucleus	enzyme
DEGS1	degenerative spermatocyte homolog 1, lipid desaturase (Drosophila)	209250_at	1.036		Plasma Membrane	enzyme
DFFA	DNA fragmentation factor, 45kDa, alpha polypeptide	203277_at	-1.883	-1.782	Nucleus	enzyme
DHFR	dihydrofolate reductase	202534_x_at	-1.310	-1.422	Unknown	enzyme
DHX9	DEAH (Asp-Glu-Ala-His) box polypeptide 9	202420_s_at	-1.454		Nucleus	enzyme
DIAPH1	diaphanous homolog 1 (Drosophila)	209190_s_at	-1.077		Cytoplasm	other
DLG7	discs, large (Drosophila) homolog-associated protein 5	203764_at	1.274	-1.235	Nucleus	phosphatase
DNAJA1	DnaJ (Hsp40) homolog, subfamily A, member 1	200881_s_at	-2.574	-1.195	Nucleus	other
DNAJB1	DnaJ (Hsp40) homolog, subfamily B, member 1	200666_s_at	-1.927		Nucleus	other
DNAJB6	DnaJ (Hsp40) homolog, subfamily B, member 6	208811_s_at	-1.374		Nucleus	transcription regulator
DNAJB12	DnaJ (Hsp40) homolog, subfamily B, member 12	202866_at		1.134	Cytoplasm	other
DNAJC9	DnaJ (Hsp40) homolog, subfamily C, member 9	213092_x_at	1.168	-1.240	Unknown	other
DNMT1	DNA (cytosine-5-)-methyltransferase 1	201697_s_at	1.433		Nucleus	enzyme
DONSON	downstream neighbor of SON	221677_s_at	1.176	1.134	Unknown	other
DPM1	dolichyl-phosphate mannosyltransferase polypeptide 1, catalytic subunit	202673_at		-1.236	Cytoplasm	enzyme
DPP3	dipeptidyl-peptidase 3	218567_x_at	-1.416	1.156	Cytoplasm	peptidase
DPYD	dihydropyrimidine dehydrogenase	204646_at		1.475	Cytoplasm	enzyme
DPYSL2	dihydropyrimidinase-like 2	200762_at	-4.419		Cytoplasm	enzyme
DTL	denticleless homolog (Drosophila)	218585_s_at	-1.102		Nucleus	other
DTYMK	deoxythymidylate kinase (thymidylate kinase)	203270_at	-1.625	-2.147	Unknown	kinase
DUSP1	dual specificity phosphatase 1	201041_s_at	-1.777	-4.613	Nucleus	phosphatase
DUT (includes EG:1854)	deoxyuridine triphosphatase	208955_at	-1.585	1.529	Nucleus	enzyme
DYNC1H1	dynein, cytoplasmic 1, heavy chain 1	211928_at		-1.346	Cytoplasm	peptidase
EBNA1BP2	EBNA1 binding protein 2	201323_at	-2.217		Nucleus	other
EBP	emopamil binding protein (sterol isomerase)	202735_at	-2.312		Cytoplasm	enzyme
ECT2	epithelial cell transforming sequence 2 oncogene	219787_s_at	-1.224	-1.351	Nucleus	other
EDG2	lysophosphatidic acid receptor 1	--		1.456	Plasma Membrane	G-protein coupled receptor
EEF1E1	eukaryotic translation elongation factor 1 epsilon 1	204905_s_at	-1.468		Cytoplasm	translation regulator
EGFR	epidermal growth factor receptor (erythroblastic leukemia viral (v-erb-b) oncogene homolog, avian)	201984_s_at	-1.531		Plasma Membrane	kinase
EID1	EP300 interacting inhibitor of differentiation 1	208670_s_at	-1.246		Nucleus	transcription regulator
EIF5	eukaryotic translation initiation factor 5	208706_s_at	-1.580		Cytoplasm	translation regulator
EIF1AX	eukaryotic translation initiation factor 1A, X-linked	201018_at	-1.697	-1.233	Cytoplasm	translation regulator
EIF1AY	eukaryotic translation initiation factor 1A, Y-linked	204409_s_at	-1.302		Cytoplasm	translation regulator
EIF2S1	eukaryotic translation initiation factor 2, subunit 1 alpha, 35kDa	201143_s_at	-1.814		Cytoplasm	translation regulator
EIF3J	eukaryotic translation initiation factor 3, subunit J	208264_s_at	-1.083		Cytoplasm	translation regulator
EIF4A2	eukaryotic translation initiation factor 4A, isoform 2	200912_s_at	-2.159		Cytoplasm	translation regulator
EIF4B	eukaryotic translation initiation factor 4B	--		-1.436	Cytoplasm	translation regulator
EIF4E	eukaryotic translation initiation factor 4E	201437_s_at	-2.988	-1.828	Cytoplasm	translation regulator
EIF4E2	eukaryotic translation initiation factor 4E family member 2	209393_s_at	-1.176		Cytoplasm	translation regulator
EIF5B	eukaryotic translation initiation factor 5B	201024_x_at	-2.010	-1.355	Cytoplasm	translation regulator
EPAS1	endothelial PAS domain protein 1	200878_at	-2.200		Nucleus	transcription regulator
EPB41L2	erythrocyte membrane protein band 4.1-like 2	201719_s_at	-2.462	-1.435	Plasma Membrane	other
ESM1	endothelial cell-specific molecule 1	208394_x_at	-1.178	1.055	Extracellular Space	growth factor
EWSR1	Ewing sarcoma breakpoint region 1	210011_s_at	-1.055		Nucleus	other
EXOC3	exocyst complex component 3	212630_at		1.147	Plasma Membrane	transporter
EXOSC8	exosome component 8	215136_s_at		-1.485	Nucleus	enzyme
EXOSC9	exosome component 9	205061_s_at	-1.200		Nucleus	enzyme
EZH2	enhancer of zeste homolog 2 (Drosophila)	203358_s_at	-1.588		Nucleus	transcription regulator
F8A1	coagulation factor VIII-associated (intronic transcript) 1	203274_at	-2.082		Extracellular Space	other
FAM111A	family with sequence similarity 111, member A	218248_at	1.195		Unknown	other
FAM129A	family with sequence similarity 129, member A	217967_s_at	-1.053		Unknown	other
FAM60A	family with sequence similarity 60, member A	220147_s_at		1.183	Unknown	other
FANCI	Fanconi anemia, complementation group I	213007_at	1.232		Unknown	other
FANCL	Fanconi anemia, complementation group L	218397_at	1.355		Nucleus	other
FBXO9	F-box protein 9	210638_s_at	1.336	-1.049	Cytoplasm	enzyme
FDFT1	farnesyl-diphosphate farnesyltransferase 1	208647_at	-1.104	-1.313	Cytoplasm	enzyme
FDPS	farnesyl diphosphate synthase (farnesyl pyrophosphate synthetase, dimethylallyltranstransferase, geranyltranstransferase)	201275_at	-2.442		Cytoplasm	enzyme
FDXR	ferredoxin reductase	207813_s_at		-1.211	Cytoplasm	enzyme
FEN1	flap structure-specific endonuclease 1	204768_s_at	-1.203	1.899	Nucleus	enzyme
FGF2	fibroblast growth factor 2 (basic)	204421_s_at	-1.474	-1.201	Extracellular Space	growth factor
FLII	flightless I homolog (Drosophila)	--		-1.463	Nucleus	other
FLJ11259	DNA-damage regulated autophagy modulator 1	218627_at		-1.277	Unknown	other
FLNB	filamin B, beta	208614_s_at	-1.445		Cytoplasm	other
FOS	FBJ murine osteosarcoma viral oncogene homolog	--			Nucleus	transcription regulator
FOXM1	forkhead box M1	202580_x_at		-1.542	Nucleus	transcription regulator
FST	follistatin	207345_at	-1.619	-1.317	Extracellular Space	other
FUSIP1	FUS interacting protein (serine/arginine-rich) 1	206095_s_at	-2.203		Nucleus	other
FUT8	fucosyltransferase 8 (alpha (1,6) fucosyltransferase)	203988_s_at		1.296	Cytoplasm	enzyme
FYN	FYN oncogene related to SRC, FGR, YES	210105_s_at	-1.027		Plasma Membrane	kinase
GBL	MTOR associated protein, LST8 homolog (S. cerevisiae)	220587_s_at	-1.212	1.122	Unknown	other
GCSH	glycine cleavage system protein H (aminomethyl carrier)	213129_s_at	-1.186		Cytoplasm	enzyme
GDF15	growth differentiation factor 15	221577_x_at	-1.037	1.144	Extracellular Space	growth factor
GINS1	GINS complex subunit 1 (Psf1 homolog)	206102_at	-1.149	-1.380	Nucleus	other
GINS2	GINS complex subunit 2 (Psf2 homolog)	221521_s_at	-1.450	-1.075	Nucleus	other
GINS3	GINS complex subunit 3 (Psf3 homolog)	218719_s_at	1.211		Unknown	other
GLA	galactosidase, alpha	214430_at	-1.080		Cytoplasm	enzyme
GLIPR1	GLI pathogenesis-related 1	214085_x_at	-1.194		Extracellular Space	other
GM2A	GM2 ganglioside activator	212737_at		1.139	Cytoplasm	enzyme
GMNN	geminin, DNA replication inhibitor	218350_s_at	-1.074		Nucleus	other
GNG11	guanine nucleotide binding protein (G protein), gamma 11	204115_at	-1.291		Plasma Membrane	enzyme
GPAA1	glycosylphosphatidylinositol anchor attachment protein 1 homolog (yeast)	--		1.397	Cytoplasm	enzyme
GPC1	glypican 1	202756_s_at		1.778	Plasma Membrane	transmembrane receptor
GRN	granulin	200678_x_at	-2.514	1.037	Extracellular Space	growth factor
GTF2IRD1	GTF2I repeat domain containing 1	218412_s_at	-1.383		Nucleus	transcription regulator
GULP1	GULP, engulfment adaptor PTB domain containing 1	204235_s_at		1.376	Cytoplasm	other
H2AFX	H2A histone family, member X	205436_s_at	-1.094		Nucleus	other
HAT1	histone acetyltransferase 1	203138_at	-1.300	-1.226	Nucleus	enzyme
HERC5	hect domain and RLD 5	219863_at	1.522	1.064	Cytoplasm	enzyme
HEXIM1	hexamethylene bis-acetamide inducible 1	202814_s_at	-1.583		Nucleus	transcription regulator
HIST1H4C	histone cluster 1, H4c	205967_at	-1.401	1.192	Nucleus	other
HLA-A	major histocompatibility complex, class I, A	--		1.040	Plasma Membrane	transmembrane receptor
HLA-C	major histocompatibility complex, class I, C	--		1.410	Plasma Membrane	transmembrane receptor
HLA-E	major histocompatibility complex, class I, E	200905_x_at	-2.722		Plasma Membrane	transmembrane receptor
HLA-G	major histocompatibility complex, class I, G	--		1.102	Plasma Membrane	transmembrane receptor
HMGA2	high mobility group AT-hook 2	208025_s_at		1.195	Nucleus	other
HMGB2	high-mobility group box 2	208808_s_at			Nucleus	transcription regulator
HMGCR	3-hydroxy-3-methylglutaryl-Coenzyme A reductase	202539_s_at	-1.386		Cytoplasm	enzyme
HMGN3	high mobility group nucleosomal binding domain 3	209377_s_at	-1.349	-1.717	Nucleus	other
HMMR	hyaluronan-mediated motility receptor (RHAMM)	--		1.226	Plasma Membrane	other
HNRPA3	heterogeneous nuclear ribonucleoprotein A3	206809_s_at	-1.476	1.208	Nucleus	other
HNRPD	heterogeneous nuclear ribonucleoprotein D (AU-rich element RNA binding protein 1, 37kDa)	221480_at	-1.181	-1.050	Nucleus	transcription regulator
HNRPL	heterogeneous nuclear ribonucleoprotein L	35201_at		1.100	Nucleus	other
HOXA9	homeobox A9	209905_at	-2.252		Nucleus	transcription regulator
HRB	ArfGAP with FG repeats 1	218091_at	-1.262		Nucleus	other
HS2ST1	heparan sulfate 2-O-sulfotransferase 1	203285_s_at	-1.394	-1.240	Cytoplasm	enzyme
HSBP1	heat shock factor binding protein 1	200941_at	-1.907		Nucleus	transcription regulator
HSD17B11	hydroxysteroid (17-beta) dehydrogenase 11	217989_at		1.074	Cytoplasm	enzyme
HSPA9	heat shock 70kDa protein 9 (mortalin)	200690_at	-3.130		Cytoplasm	other
HSPA14	heat shock 70kDa protein 14	219212_at	1.043	-2.185	Cytoplasm	peptidase
HSPA1A	heat shock 70kDa protein 1A	200799_at	-2.479	-2.062	Cytoplasm	other
HSPA1B	heat shock 70kDa protein 1B	202581_at	-1.476	-2.001	Cytoplasm	other
HSPA4L	heat shock 70kDa protein 4-like	205543_at		1.378	Cytoplasm	other
HSPE1	heat shock 10kDa protein 1 (chaperonin 10)	205133_s_at	1.758	-1.192	Cytoplasm	enzyme
HSPH1	heat shock 105kDa/110kDa protein 1	208744_x_at	-1.145		Cytoplasm	other
IDH3A	isocitrate dehydrogenase 3 (NAD+) alpha	202070_s_at	-1.204		Cytoplasm	enzyme
IDI1	isopentenyl-diphosphate delta isomerase 1	208881_x_at	-1.508		Cytoplasm	enzyme
ILF3	interleukin enhancer binding factor 3, 90kDa	208931_s_at	-1.095		Nucleus	transcription regulator
INSIG1	insulin induced gene 1	201627_s_at	-1.507	-1.205	Cytoplasm	other
IPO7	importin 7	200995_at	-2.069	-1.735	Nucleus	transporter
IQCB1	IQ motif containing B1	211707_s_at	-1.086		Extracellular Space	other
IRS2	insulin receptor substrate 2	209185_s_at	-1.391		Cytoplasm	other
ITGB3BP	integrin beta 3 binding protein (beta3-endonexin)	205176_s_at	-1.191		Nucleus	other
JAG2	jagged 2	--		-1.483	Extracellular Space	growth factor
JMJD6	jumonji domain containing 6	212723_at	1.521		Plasma Membrane	other
JUND	jun D proto-oncogene	203752_s_at	-2.231		Nucleus	transcription regulator
KCNMA1	potassium large conductance calcium-activated channel, subfamily M, alpha member 1	221584_s_at		1.188	Plasma Membrane	ion channel
KDELR2	KDEL (Lys-Asp-Glu-Leu) endoplasmic reticulum protein retention receptor 2	200699_at	-3.197		Cytoplasm	transporter
KIAA0101	KIAA0101	211713_x_at	-1.326		Nucleus	other
KIF11	kinesin family member 11	204444_at	-1.597	-1.141	Nucleus	other
KIF14	kinesin family member 14	206364_at	-1.380	-2.731	Cytoplasm	other
KIF23	kinesin family member 23	204709_s_at	-1.432	-1.435	Cytoplasm	other
KIF18A	kinesin family member 18A	221258_s_at	-1.115		Cytoplasm	other
KIF20A	kinesin family member 20A	218755_at	-1.208	1.086	Cytoplasm	transporter
KIF2C	kinesin family member 2C	209408_at	1.187		Nucleus	other
KIF4A	kinesin family member 4A	218355_at		1.023	Nucleus	other
KLF4	Kruppel-like factor 4 (gut)	221841_s_at		1.357	Nucleus	transcription regulator
KLHL21	kelch-like 21 (Drosophila)	203068_at		-1.095	Unknown	other
KPNA1	karyopherin alpha 1 (importin alpha 5)	202056_at	-2.377		Nucleus	transporter
KPNA2	karyopherin alpha 2 (RAG cohort 1, importin alpha 1)	211762_s_at	-1.564	-1.287	Nucleus	transporter
KPNB1	karyopherin (importin) beta 1	213574_s_at	-1.217	-1.160	Nucleus	transporter
KRR1	KRR1, small subunit (SSU) processome component, homolog (yeast)	203203_s_at	2.086		Nucleus	other
LAMC1	laminin, gamma 1 (formerly LAMB2)	200770_s_at	-2.129	2.147	Extracellular Space	other
LBR	lamin B receptor	201795_at	2.562	1.433	Nucleus	enzyme
LDLR	low density lipoprotein receptor	202068_s_at	-1.758	1.975	Plasma Membrane	transporter
LGALS3BP	lectin, galactoside-binding, soluble, 3 binding protein	200923_at		-1.728	Plasma Membrane	transmembrane receptor
LHFPL2	lipoma HMGIC fusion partner-like 2	212658_at	1.327		Unknown	enzyme
LOC339047	hypothetical protein LOC339047	221501_x_at	1.188	1.051	Unknown	other
LRBA	LPS-responsive vesicle trafficking, beach and anchor containing	212692_s_at		1.195	Cytoplasm	other
MAD2L1	MAD2 mitotic arrest deficient-like 1 (yeast)	203362_s_at	1.538		Nucleus	other
MAGOH	mago-nashi homolog, proliferation-associated (Drosophila)	210092_at	1.133		Nucleus	other
MARS (includes EG:4141)	methionyl-tRNA synthetase	201475_x_at	-2.921	1.670	Cytoplasm	enzyme
MCAM	melanoma cell adhesion molecule	211042_x_at	-1.210		Plasma Membrane	other
MCM3	minichromosome maintenance complex component 3	201555_at	-1.350		Nucleus	enzyme
MCM4	minichromosome maintenance complex component 4	212141_at	-1.240	1.176	Nucleus	enzyme
MCM5	minichromosome maintenance complex component 5	216237_s_at	1.303		Nucleus	enzyme
MCM6	minichromosome maintenance complex component 6	201930_at	-1.999		Nucleus	enzyme
MDK	midkine (neurite growth-promoting factor 2)	209035_at	1.487		Extracellular Space	growth factor
MED21	mediator complex subunit 21	209362_at	-1.275		Nucleus	transcription regulator
MED27	mediator complex subunit 27	--		-1.145	Nucleus	transcription regulator
MEIS2	Meis homeobox 2	207480_s_at	-1.015		Nucleus	transcription regulator
MEST	mesoderm specific transcript homolog (mouse)	202016_at	-1.489		Extracellular Space	peptidase
MGAT2	mannosyl (alpha-1,6-)-glycoprotein beta-1,2-N-acetylglucosaminyltransferase	203102_s_at	-1.140	1.432	Cytoplasm	enzyme
MINK1	misshapen-like kinase 1 (zebrafish)	214246_x_at	1.103	-1.005	Cytoplasm	kinase
MKI67	antigen identified by monoclonal antibody Ki-67	212021_s_at	-1.041		Nucleus	other
MLLT11	myeloid/lymphoid or mixed-lineage leukemia (trithorax homolog, Drosophila); translocated to, 11	211071_s_at	-1.212		Unknown	other
MOBKL1B	MOB1, Mps One Binder kinase activator-like 1B (yeast)	214812_s_at	-1.338		Plasma Membrane	other
MRPL13	mitochondrial ribosomal protein L13	218049_s_at	-1.034		Cytoplasm	other
MRPL16	mitochondrial ribosomal protein L16	217980_s_at	-1.142		Unknown	other
MSH2	mutS homolog 2, colon cancer, nonpolyposis type 1 (E. coli)	209421_at	-1.446		Nucleus	enzyme
MSH6	mutS homolog 6 (E. coli)	202911_at	-1.169		Nucleus	enzyme
MT1F	metallothionein 1F	217165_x_at	1.344		Cytoplasm	other
MT1X	metallothionein 1X	208581_x_at	-1.146		Unknown	other
MT2A	metallothionein 2A	212185_x_at	-1.214		Cytoplasm	other
MYCBP	c-myc binding protein	203359_s_at	-1.335	1.207	Nucleus	transcription regulator
NAB1	NGFI-A binding protein 1 (EGR1 binding protein 1)	209272_at	-1.035		Nucleus	transcription regulator
NAP1L1	nucleosome assembly protein 1-like 1	208754_s_at	1.280		Nucleus	other
NARG1	NMDA receptor regulated 1	219158_s_at	1.002		Nucleus	transcription regulator
NASP	nuclear autoantigenic sperm protein (histone-binding)	201970_s_at	-1.314		Nucleus	other
NBR1	neighbor of BRCA1 gene 1	201384_s_at	-2.189	1.084	Unknown	other
NCAPD3	non-SMC condensin II complex, subunit D3	212789_at	-1.211	1.209	Nucleus	other
NCAPG (includes EG:64151)	non-SMC condensin I complex, subunit G	218663_at	-1.350		Nucleus	other
NCAPH	non-SMC condensin I complex, subunit H	212949_at	-1.026	1.594	Nucleus	other
NCK1 (includes EG:4690)	NCK adaptor protein 1	211063_s_at	-1.278		Cytoplasm	kinase
NDC80	NDC80 homolog, kinetochore complex component (S. cerevisiae)	204162_at	-1.369	-1.071	Nucleus	other
NDUFA5	NADH dehydrogenase (ubiquinone) 1 alpha subcomplex, 5, 13kDa	201304_at	-2.110		Cytoplasm	enzyme
NEK9	NIMA (never in mitosis gene a)- related kinase 9	212299_at	1.139		Nucleus	kinase
NET1	neuroepithelial cell transforming 1	201830_s_at	-2.149		Nucleus	other
NFATC3	nuclear factor of activated T-cells, cytoplasmic, calcineurin-dependent 3	210555_s_at		1.018	Nucleus	transcription regulator
NFE2L1	nuclear factor (erythroid-derived 2)-like 1	200758_s_at	-1.822	-2.250	Nucleus	transcription regulator
NISCH	nischarin	201591_s_at		-1.403	Plasma Membrane	transmembrane receptor
NLE1	notchless homolog 1 (Drosophila)	203867_s_at	-1.224	1.276	Nucleus	enzyme
NME7	non-metastatic cells 7, protein expressed in (nucleoside-diphosphate kinase)	219553_at		1.233	Unknown	kinase
NMT2	N-myristoyltransferase 2	205006_s_at	-1.479		Cytoplasm	enzyme
NOL8	nucleolar protein 8	218244_at		-1.698	Nucleus	other
NOLA1	GAR1 ribonucleoprotein homolog (yeast)	219110_at	-1.056		Nucleus	ion channel
NOLC1	nucleolar and coiled-body phosphoprotein 1	211951_at	1.186		Nucleus	other
NPDC1	neural proliferation, differentiation and control, 1	218086_at	-1.018	-1.003	Extracellular Space	other
NPIP	nuclear pore complex interacting protein	204538_x_at	-1.404	-1.032	Nucleus	other
NRIP1	nuclear receptor interacting protein 1	202599_s_at	-2.029		Nucleus	transcription regulator
NRP1	neuropilin 1	212298_at		1.167	Plasma Membrane	transmembrane receptor
NSL1	NSL1, MIND kinetochore complex component, homolog (S. cerevisiae)	209484_s_at	-1.142		Nucleus	other
NUDT21	nudix (nucleoside diphosphate linked moiety X)-type motif 21	213461_at	1.214		Nucleus	other
NUP50	nucleoporin 50kDa	213682_at	-1.166	1.090	Nucleus	transporter
NUP85	nucleoporin 85kDa	218014_at	-1.077		Cytoplasm	other
NUP88	nucleoporin 88kDa	202900_s_at	-1.291		Nucleus	transporter
NUP160	nucleoporin 160kDa	212709_at	-1.054		Nucleus	transporter
NXT2	nuclear transport factor 2-like export factor 2	209628_at	1.251		Nucleus	transporter
OGT	O-linked N-acetylglucosamine (GlcNAc) transferase (UDP-N-acetylglucosamine:polypeptide-N-acetylglucosaminyl transferase)	212307_s_at	-1.201	-1.067	Cytoplasm	enzyme
OPA1	optic atrophy 1 (autosomal dominant)	212214_at	-1.418		Cytoplasm	enzyme
OPTN	optineurin	202074_s_at	-2.048	-1.600	Cytoplasm	other
ORC6L	origin recognition complex, subunit 6 like (yeast)	219105_x_at	-1.054		Nucleus	other
PA2G4	proliferation-associated 2G4, 38kDa	214794_at	2.304		Nucleus	transcription regulator
PACSIN2	protein kinase C and casein kinase substrate in neurons 2	201651_s_at	2.300		Cytoplasm	transporter
PAFAH1B1	platelet-activating factor acetylhydrolase, isoform Ib, subunit 1 (45kDa)	200816_s_at	-2.156	-1.580	Cytoplasm	enzyme
PALLD	palladin, cytoskeletal associated protein	200907_s_at	-1.798		Cytoplasm	other
PANK2	pantothenate kinase 2	218809_at	1.629		Cytoplasm	kinase
PAXIP1	PAX interacting (with transcription-activation domain) protein 1	212825_at	-1.300		Nucleus	other
PBK	PDZ binding kinase	219148_at	-1.118	-1.250	Cytoplasm	kinase
PBX1	pre-B-cell leukemia homeobox 1	212151_at	1.367		Nucleus	transcription regulator
PCGF2	polycomb group ring finger 2	214239_x_at	1.351		Nucleus	transcription regulator
PCNA	proliferating cell nuclear antigen	201202_at	-2.900		Nucleus	other
PDSS1	prenyl (decaprenyl) diphosphate synthase, subunit 1	220865_s_at	-1.101	-1.253	Unknown	enzyme
PGLS	6-phosphogluconolactonase	218388_at	1.587		Cytoplasm	enzyme
PGRMC2	progesterone receptor membrane component 2	213227_at	-1.170	-1.045	Nucleus	ligand-dependent nuclear receptor
PHB (includes EG:5245)	prohibitin	200659_s_at	-2.327		Nucleus	transcription regulator
PHGDH	phosphoglycerate dehydrogenase	201397_at	-1.509	-1.761	Cytoplasm	enzyme
PHIP	pleckstrin homology domain interacting protein	212542_s_at	1.042		Nucleus	other
PHLDA2	pleckstrin homology-like domain, family A, member 2	209803_s_at	-1.779	-1.274	Cytoplasm	other
PIGP	phosphatidylinositol glycan anchor biosynthesis, class P	221689_s_at	-1.024		Plasma Membrane	enzyme
PIK3R4	phosphoinositide-3-kinase, regulatory subunit 4	212740_at	-1.299		Cytoplasm	kinase
PINK1	PTEN induced putative kinase 1	--		1.182	Cytoplasm	kinase
PLAT	plasminogen activator, tissue	201860_s_at	-1.515	-1.492	Extracellular Space	peptidase
PLAUR	plasminogen activator, urokinase receptor	211924_s_at	-1.092		Plasma Membrane	transmembrane receptor
PLK4	polo-like kinase 4 (Drosophila)	204887_s_at	-1.046	-1.348	Cytoplasm	kinase
PLS1 (includes EG:5357)	plastin 1 (I isoform)	205190_at	-1.275	-1.430	Cytoplasm	other
PLXNB2	plexin B2	208890_s_at		1.250	Plasma Membrane	other
PNN	pinin, desmosome associated protein	212037_at	-1.608	-1.218	Plasma Membrane	other
POLD3	polymerase (DNA-directed), delta 3, accessory subunit	212836_at	-1.199		Nucleus	transcription regulator
POLE2	polymerase (DNA directed), epsilon 2 (p59 subunit)	205909_at	1.126	-1.098	Nucleus	enzyme
POLE3	polymerase (DNA directed), epsilon 3 (p17 subunit)	208828_at	-1.943		Nucleus	enzyme
POLR3K	polymerase (RNA) III (DNA directed) polypeptide K, 12.3 kDa	218866_s_at	-1.133		Nucleus	transcription regulator
POP7	processing of precursor 7, ribonuclease P/MRP subunit (S. cerevisiae)	209482_at	-1.093		Nucleus	enzyme
PPM1B	protein phosphatase 1B (formerly 2C), magnesium-dependent, beta isoform	209296_at		1.418	Unknown	phosphatase
PPP1CB	protein phosphatase 1, catalytic subunit, beta isoform	201408_at	-1.562		Cytoplasm	phosphatase
PPP1R15A (includes EG:23645)	protein phosphatase 1, regulatory (inhibitor) subunit 15A	37028_at	-1.111	1.112	Cytoplasm	other
PPP2R1B	protein phosphatase 2 (formerly 2A), regulatory subunit A, beta isoform	202883_s_at	-2.083		Unknown	phosphatase
PPP3CA	protein phosphatase 3 (formerly 2B), catalytic subunit, alpha isoform	--		-1.389	Cytoplasm	phosphatase
PRC1	protein regulator of cytokinesis 1	218009_s_at	-1.102	-1.170	Nucleus	other
PRDM4	PR domain containing 4	218329_at	-1.267		Nucleus	transcription regulator
PRKACB	protein kinase, cAMP-dependent, catalytic, beta	202741_at	-1.315		Cytoplasm	kinase
PRPF18	PRP18 pre-mRNA processing factor 18 homolog (S. cerevisiae)	221547_at	-1.575		Nucleus	transporter
PRPF4B	PRP4 pre-mRNA processing factor 4 homolog B (yeast)	202126_at	-1.753		Nucleus	kinase
PRPS1	phosphoribosyl pyrophosphate synthetase 1	209440_at	-1.352		Unknown	kinase
PSAP	prosaposin	200866_s_at	-2.361	-1.642	Extracellular Space	other
PSAT1	phosphoserine aminotransferase 1	220892_s_at	-1.413		Cytoplasm	enzyme
PSMA2	proteasome (prosome, macropain) subunit, alpha type, 2	201316_at	-1.757	-2.124	Cytoplasm	peptidase
PSMC2	proteasome (prosome, macropain) 26S subunit, ATPase, 2	201067_at	-1.696		Nucleus	peptidase
PSMC3IP	PSMC3 interacting protein	213951_s_at	1.397		Nucleus	other
PSMD6	proteasome (prosome, macropain) 26S subunit, non-ATPase, 6	202753_at			Cytoplasm	enzyme
PSMD12	proteasome (prosome, macropain) 26S subunit, non-ATPase, 12	202353_s_at	-1.840	-1.018	Cytoplasm	other
PTGER4	prostaglandin E receptor 4 (subtype EP4)	204897_at	-1.290		Plasma Membrane	G-protein coupled receptor
PTP4A1	protein tyrosine phosphatase type IVA, member 1	--		-2.493	Nucleus	phosphatase
PTP4A2	protein tyrosine phosphatase type IVA, member 2	208615_s_at	-1.331	-1.101	Plasma Membrane	phosphatase
PTX3	pentraxin-related gene, rapidly induced by IL-1 beta	206157_at		-2.089	Extracellular Space	other
RAB1A	RAB1A, member RAS oncogene family	207791_s_at	-1.566		Cytoplasm	enzyme
RAB2A	RAB2A, member RAS oncogene family	--		-2.224	Cytoplasm	enzyme
RAB7A	RAB7A, member RAS oncogene family	--		-1.276	Cytoplasm	enzyme
RAB8A	RAB8A, member RAS oncogene family	208819_at	1.926		Cytoplasm	enzyme
RABEP1	rabaptin, RAB GTPase binding effector protein 1	214552_s_at		1.024	Cytoplasm	transporter
RACGAP1	Rac GTPase activating protein 1	222077_s_at	1.013	-1.229	Cytoplasm	transporter
RAD1	RAD1 homolog (S. pombe)	204460_s_at	-1.478		Nucleus	enzyme
RAD17	RAD17 homolog (S. pombe)	210826_x_at	1.169		Nucleus	other
RAD50	RAD50 homolog (S. cerevisiae)	208393_s_at	-1.048	-1.869	Nucleus	enzyme
RAD51AP1	RAD51 associated protein 1	204146_at	-1.101		Nucleus	other
RANBP1	RAN binding protein 1	202483_s_at	-1.339		Nucleus	other
RANBP2	RAN binding protein 2	--		-1.523	Nucleus	enzyme
RB1	retinoblastoma 1	203132_at	-1.160		Nucleus	transcription regulator
RBBP4	retinoblastoma binding protein 4	210371_s_at	-1.105		Nucleus	enzyme
RBM25	RNA binding motif protein 25	212027_at	-2.343	-1.165	Nucleus	other
RBX1	ring-box 1	218117_at		1.053	Cytoplasm	enzyme
RDH11	retinol dehydrogenase 11 (all-trans/9-cis/11-cis)	217775_s_at	-1.102	-1.680	Cytoplasm	enzyme
RECQL	RecQ protein-like (DNA helicase Q1-like)	212918_at	-1.667		Nucleus	enzyme
REEP5	receptor accessory protein 5	208873_s_at	-2.099	1.436	Extracellular Space	transporter
REXO4	REX4, RNA exonuclease 4 homolog (S. cerevisiae)	218767_at		-1.324	Nucleus	transcription regulator
RFC2	replication factor C (activator 1) 2, 40kDa	203696_s_at	-1.369		Nucleus	other
RFC3	replication factor C (activator 1) 3, 38kDa	204127_at	-2.506	-1.286	Nucleus	enzyme
RFC5	replication factor C (activator 1) 5, 36.5kDa	203209_at	-1.354	4.253	Nucleus	enzyme
RGS4	regulator of G-protein signaling 4	204337_at	-1.101	-1.336	Cytoplasm	other
RNASEH1	ribonuclease H1	218496_at	1.243		Nucleus	enzyme
RND3	Rho family GTPase 3	212724_at	1.047		Cytoplasm	enzyme
RNF139	ring finger protein 139	209510_at	-1.167		Cytoplasm	enzyme
RPA2	replication protein A2, 32kDa	201756_at	-1.387		Nucleus	other
RPA3	replication protein A3, 14kDa	209507_at			Nucleus	other
RPIA	ribose 5-phosphate isomerase A	212973_at	-1.040	-1.103	Cytoplasm	enzyme
RRM2	ribonucleotide reductase M2	201890_at	-2.497		Nucleus	enzyme
RSU1	Ras suppressor protein 1	201980_s_at		1.927	Cytoplasm	other
RTN3	reticulon 3	219549_s_at	1.176		Cytoplasm	other
RYBP	RING1 and YY1 binding protein	201845_s_at	-1.477		Nucleus	transcription regulator
SAP30	Sin3A-associated protein, 30kDa	204900_x_at	-1.432		Nucleus	transcription regulator
SAR1A	SAR1 homolog A (S. cerevisiae)	201542_at	-2.008		Cytoplasm	enzyme
SARS	seryl-tRNA synthetase	200802_at	-1.357	1.988	Cytoplasm	enzyme
SAT1	spermidine/spermine N1-acetyltransferase 1	--		1.251	Cytoplasm	enzyme
SAV1	salvador homolog 1 (Drosophila)	218276_s_at		1.358	Unknown	other
SC4MOL	sterol-C4-methyl oxidase-like	209146_at	-1.081		Cytoplasm	enzyme
SCD	stearoyl-CoA desaturase (delta-9-desaturase)	200831_s_at	-2.801		Cytoplasm	enzyme
SCYE1	aminoacyl tRNA synthetase complex-interacting multifunctional protein 1	202541_at	-1.567		Extracellular Space	cytokine
SEC31A	SEC31 homolog A (S. cerevisiae)	--		1.116	Cytoplasm	other
SEL1L	sel-1 suppressor of lin-12-like (C. elegans)	202061_s_at	-1.475		Cytoplasm	other
SEPHS1	selenophosphate synthetase 1	--		1.326	Unknown	enzyme
SEPW1	selenoprotein W, 1	201194_at	-1.284		Cytoplasm	enzyme
SERTAD2	SERTA domain containing 2	--		1.733	Cytoplasm	transcription regulator
SESN1	sestrin 1	218346_s_at		-1.429	Nucleus	other
SF3A3	splicing factor 3a, subunit 3, 60kDa	203818_s_at	-1.202		Nucleus	other
SFRS1	splicing factor, arginine/serine-rich 1	211784_s_at	1.185		Nucleus	other
SFRS2	splicing factor, arginine/serine-rich 2	200753_x_at	-2.563	2.039	Nucleus	transcription regulator
SFRS3	splicing factor, arginine/serine-rich 3	208673_s_at	-1.400	-1.055	Nucleus	other
SFRS6	splicing factor, arginine/serine-rich 6	208804_s_at	-1.513		Nucleus	other
SFRS7	splicing factor, arginine/serine-rich 7, 35kDa	214141_x_at	-1.301		Nucleus	other
SFRS10	transformer 2 beta homolog (Drosophila)	200893_at	-2.192	-2.468	Nucleus	other
SH2B3	SH2B adaptor protein 3	203320_at	1.383		Cytoplasm	other
SH3GLB1	SH3-domain GRB2-like endophilin B1	209091_s_at	-1.585		Cytoplasm	enzyme
SHCBP1	SHC SH2-domain binding protein 1	219493_at	1.317	1.729	Unknown	other
SIVA1	SIVA1, apoptosis-inducing factor	203489_at	-1.707	2.877	Cytoplasm	other
SKP2	S-phase kinase-associated protein 2 (p45)	203625_x_at	-1.254		Nucleus	other
SKP1A	S-phase kinase-associated protein 1	200711_s_at	-2.295		Nucleus	transcription regulator
SLC16A1	solute carrier family 16, member 1 (monocarboxylic acid transporter 1)	202234_s_at	1.624	-1.633	Plasma Membrane	transporter
SLC25A12	solute carrier family 25 (mitochondrial carrier, Aralar), member 12	203339_at	-1.758	-1.227	Cytoplasm	transporter
SLC25A13	solute carrier family 25, member 13 (citrin)	203775_at	1.910	-1.285	Cytoplasm	transporter
SLC3A2	solute carrier family 3 (activators of dibasic and neutral amino acid transport), member 2	200924_s_at	-1.695		Plasma Membrane	transporter
SLC5A3	solute carrier family 5 (sodium/myo-inositol cotransporter), member 3	213164_at	1.144		Plasma Membrane	transporter
SLC6A8	solute carrier family 6 (neurotransmitter transporter, creatine), member 8	--		1.487	Cytoplasm	transporter
SLC6A15	solute carrier family 6 (neutral amino acid transporter), member 15	206376_at	-1.039	1.274	Plasma Membrane	transporter
SLC7A5	solute carrier family 7 (cationic amino acid transporter, y+ system), member 5	201195_s_at	-1.978		Plasma Membrane	transporter
SLIT2	slit homolog 2 (Drosophila)	209897_s_at		-1.426	Extracellular Space	other
SMARCA5	SWI/SNF related, matrix associated, actin dependent regulator of chromatin, subfamily a, member 5	213251_at	-1.015		Nucleus	transcription regulator
SMARCE1	SWI/SNF related, matrix associated, actin dependent regulator of chromatin, subfamily e, member 1	211988_at	-1.421		Nucleus	transcription regulator
SMC2	structural maintenance of chromosomes 2	204240_s_at	-1.425		Nucleus	transporter
SMC3	structural maintenance of chromosomes 3	209259_s_at	-1.189		Nucleus	other
SNRPA	small nuclear ribonucleoprotein polypeptide A	201770_at	-1.254		Nucleus	other
SNRPA1	small nuclear ribonucleoprotein polypeptide A'	206055_s_at	1.986		Nucleus	other
SNRPD1	small nuclear ribonucleoprotein D1 polypeptide 16kDa	--		1.378	Nucleus	other
SNX5	sorting nexin 5	217792_at	-1.078		Cytoplasm	transporter
SPAG5	sperm associated antigen 5	203145_at	-1.082		Nucleus	peptidase
SPARC	secreted protein, acidic, cysteine-rich (osteonectin)	200665_s_at	-3.080		Extracellular Space	other
SPCS2	signal peptidase complex subunit 2 homolog (S. cerevisiae)	201240_s_at	-2.160	2.934	Cytoplasm	other
SPP1	secreted phosphoprotein 1	209875_s_at	-1.318		Extracellular Space	cytokine
SPTLC2 (includes EG:9517)	serine palmitoyltransferase, long chain base subunit 2	203127_s_at	-1.619		Cytoplasm	enzyme
SQSTM1	sequestosome 1	201471_s_at	-3.356	1.474	Cytoplasm	transcription regulator
SSR3	signal sequence receptor, gamma (translocon-associated protein gamma)	217790_s_at	-1.297		Cytoplasm	other
SSX2IP	synovial sarcoma, X breakpoint 2 interacting protein	203017_s_at	-2.909	-1.618	Plasma Membrane	other
STAT3	signal transducer and activator of transcription 3 (acute-phase response factor)	--		-1.358	Nucleus	transcription regulator
STC2	stanniocalcin 2	203438_at		-1.489	Extracellular Space	other
STIP1	stress-induced-phosphoprotein 1	212009_s_at	1.323		Cytoplasm	other
STK39	serine threonine kinase 39 (STE20/SPS1 homolog, yeast)	202786_at		1.257	Nucleus	kinase
STK17A	serine/threonine kinase 17a	202695_s_at	-1.339		Nucleus	kinase
STMN1	stathmin 1	200783_s_at	-1.590		Cytoplasm	other
SUCLA2	succinate-CoA ligase, ADP-forming, beta subunit	202930_s_at	-1.717		Cytoplasm	enzyme
SYNCRIP	synaptotagmin binding, cytoplasmic RNA interacting protein	209025_s_at	1.460		Nucleus	other
TCF3	transcription factor 3 (E2A immunoglobulin enhancer binding factors E12/E47)	209153_s_at	-1.512		Nucleus	transcription regulator
TDG	thymine-DNA glycosylase	203743_s_at	-1.220		Nucleus	enzyme
TERF2	telomeric repeat binding factor 2	203611_at	-1.311	-1.489	Nucleus	other
TFAM	transcription factor A, mitochondrial	203177_x_at	-2.005		Cytoplasm	transcription regulator
TGIF1	TGFB-induced factor homeobox 1	203313_s_at	-1.454		Nucleus	transcription regulator
TGM2	transglutaminase 2 (C polypeptide, protein-glutamine-gamma-glutamyltransferase)	201042_at	-1.393		Cytoplasm	enzyme
THOC2	THO complex 2	222122_s_at	1.076		Nucleus	other
TIMM10	translocase of inner mitochondrial membrane 10 homolog (yeast)	218408_at		-1.493	Cytoplasm	transporter
TIMM13	translocase of inner mitochondrial membrane 13 homolog (yeast)	218188_s_at		-1.458	Cytoplasm	transporter
TIMM23	translocase of inner mitochondrial membrane 23 homolog (yeast)	218118_s_at	1.303		Cytoplasm	transporter
TIMM17A	translocase of inner mitochondrial membrane 17 homolog A (yeast)	215171_s_at	-1.272		Cytoplasm	transporter
TIPIN	TIMELESS interacting protein	219258_at	-1.111	1.045	Nucleus	other
TJP2	tight junction protein 2 (zona occludens 2)	202085_at	1.499	-1.273	Plasma Membrane	kinase
TK1	thymidine kinase 1, soluble	202338_at	-1.354		Cytoplasm	kinase
TM4SF1	transmembrane 4 L six family member 1	209386_at	-1.274	-1.215	Plasma Membrane	other
TMED7	transmembrane emp24 protein transport domain containing 7	214658_at	1.069		Cytoplasm	transporter
TMEM43	transmembrane protein 43	217795_s_at		-2.162	Nucleus	other
TMEM158	transmembrane protein 158	213338_at	-1.045		Plasma Membrane	other
TMPO	thymopoietin	203432_at	3.307	-1.353	Nucleus	other
TMX1	thioredoxin-related transmembrane protein 1	208097_s_at	-1.462		Cytoplasm	enzyme
TOPBP1	topoisomerase (DNA) II binding protein 1	202633_at	-1.465		Nucleus	other
TRA2A	transformer 2 alpha homolog (Drosophila)	204658_at		1.782	Nucleus	other
TRAF3IP2	TRAF3 interacting protein 2	215411_s_at		-1.323	Unknown	other
TRAPPC4	trafficking protein particle complex 4	217958_at	-1.502		Cytoplasm	other
TRHDE	thyrotropin-releasing hormone degrading enzyme	219937_at	-1.129	1.363	Plasma Membrane	peptidase
TRIB3	tribbles homolog 3 (Drosophila)	218145_at	-1.016		Nucleus	kinase
TRIM28	tripartite motif-containing 28	200990_at		-2.479	Nucleus	transcription regulator
TSC22D1	TSC22 domain family, member 1	215111_s_at		-1.066	Nucleus	transcription regulator
TSPAN6	tetraspanin 6	209109_s_at	-1.075		Plasma Membrane	other
TTC3	tetratricopeptide repeat domain 3	--		1.348	Cytoplasm	other
TTK	TTK protein kinase	204822_at	-1.010	-2.097	Nucleus	kinase
TUBA1A	tubulin, alpha 1a	209118_s_at	-1.043		Cytoplasm	other
TXNDC9	thioredoxin domain containing 9	203008_x_at	-1.699	1.527	Unknown	other
TXNIP	thioredoxin interacting protein	201010_s_at	-1.705	2.098	Cytoplasm	other
UBE2A	ubiquitin-conjugating enzyme E2A (RAD6 homolog)	201899_s_at	-1.664		Cytoplasm	enzyme
UBE2B	ubiquitin-conjugating enzyme E2B (RAD6 homolog)	211763_s_at	-1.148	1.097	Cytoplasm	enzyme
UBE2L3	ubiquitin-conjugating enzyme E2L 3	200683_s_at	2.260		Cytoplasm	enzyme
UBE2N	ubiquitin-conjugating enzyme E2N (UBC13 homolog, yeast)	201523_x_at	-3.622	-1.347	Cytoplasm	enzyme
UCHL5	ubiquitin carboxyl-terminal hydrolase L5	219960_s_at	-1.230	-1.236	Cytoplasm	peptidase
UNG	uracil-DNA glycosylase	202330_s_at	-1.597		Nucleus	enzyme
USP1	ubiquitin specific peptidase 1	202412_s_at	-1.255		Cytoplasm	peptidase
USP16	ubiquitin specific peptidase 16	218386_x_at	1.028		Cytoplasm	peptidase
USP46	ubiquitin specific peptidase 46	203869_at	-1.355		Unknown	peptidase
UTP11L (includes EG:51118)	UTP11-like, U3 small nucleolar ribonucleoprotein, (yeast)	218235_s_at	-1.048		Nucleus	other
VCP	valosin-containing protein	208648_at	-1.157		Cytoplasm	enzyme
VDAC3	voltage-dependent anion channel 3	208846_s_at	-1.425		Cytoplasm	ion channel
VEGFA	vascular endothelial growth factor A	210512_s_at	-1.176		Extracellular Space	growth factor
VPS28	vacuolar protein sorting 28 homolog (S. cerevisiae)	218679_s_at	-1.264		Cytoplasm	transporter
VRK1	vaccinia related kinase 1	203856_at	-1.140		Nucleus	kinase
VRK2	vaccinia related kinase 2	205126_at	-1.175		Nucleus	kinase
WARS	tryptophanyl-tRNA synthetase	200628_s_at	-3.448		Cytoplasm	enzyme
WDR57 (includes EG:9410)	small nuclear ribonucleoprotein 40kDa (U5)	215905_s_at	-1.214		Nucleus	other
XPC	xeroderma pigmentosum, complementation group C	209375_at	-1.650	1.140	Nucleus	other
XPOT	exportin, tRNA (nuclear export receptor for tRNAs)	212160_at	-1.055		Nucleus	other
YWHAB	tyrosine 3-monooxygenase/tryptophan 5-monooxygenase activation protein, beta polypeptide	217717_s_at	1.149		Cytoplasm	other
ZFP36L2	zinc finger protein 36, C3H type-like 2	201368_at		1.507	Nucleus	transcription regulator
ZMAT3	zinc finger, matrin type 3	219628_at		1.101	Nucleus	other
ZMPSTE24	zinc metallopeptidase (STE24 homolog, S. cerevisiae)	202939_at	-1.507		Nucleus	peptidase
ZMYND8	zinc finger, MYND-type containing 8	209049_s_at	-1.016		Nucleus	transcription regulator
ZNF207	zinc finger protein 207	200829_x_at	-2.140		Nucleus	transcription regulator
ZNF274	zinc finger protein 274	204937_s_at		-2.209	Nucleus	transcription regulator
ZWILCH	Zwilch, kinetochore associated, homolog (Drosophila)	218349_s_at	1.056		Nucleus	other
ZWINT (includes EG:11130)	ZW10 interactor	204026_s_at	-1.165		Nucleus	other
